# Supplementary material
Source: PubMed Central journal article supplement (PMC4546913)
Supplement: NIHMS707545-supplement-1.pdf [file NIHMS707545-supplement-1.pdf]

A

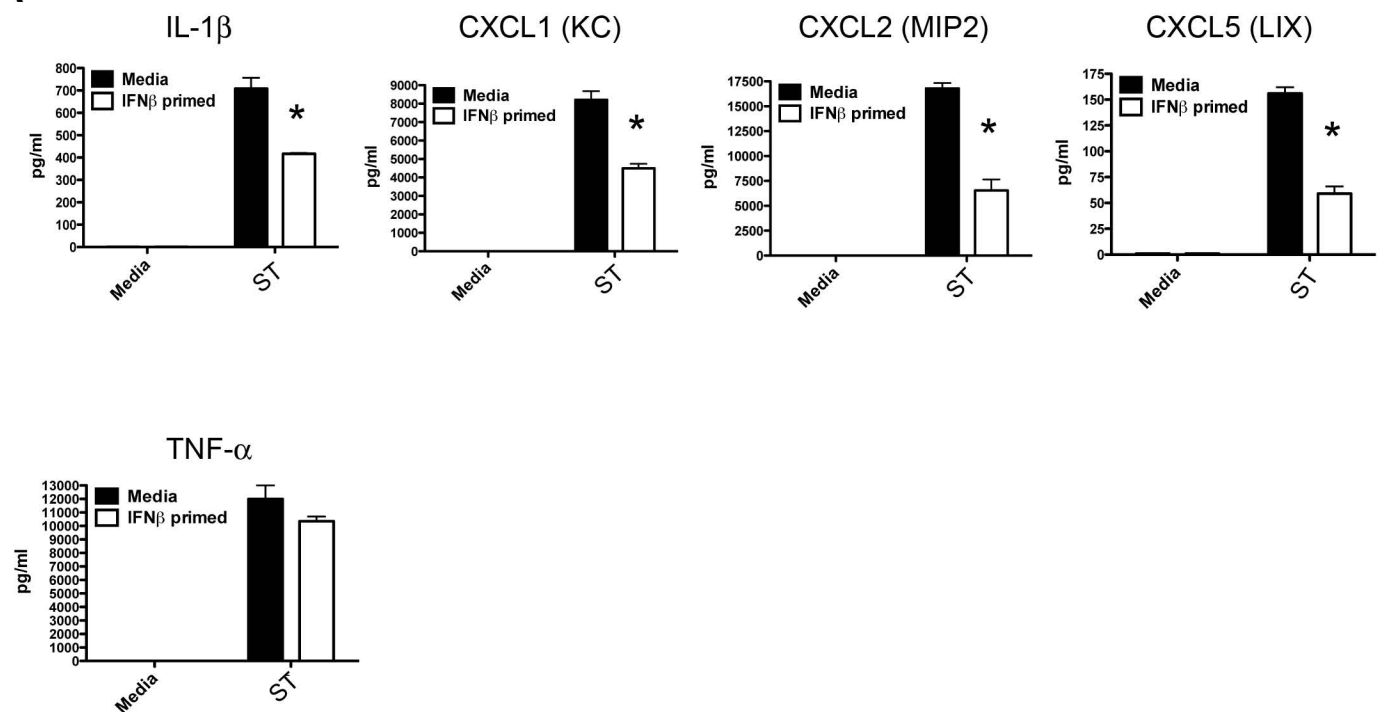

B

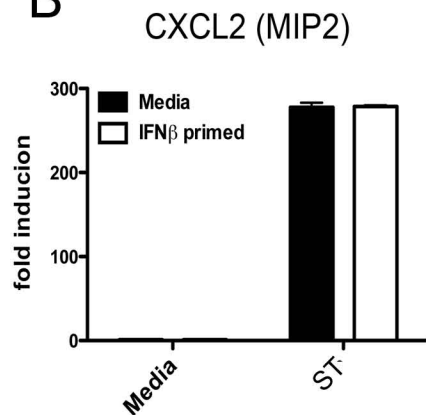

**Figure S1. Protein secretion from IFN- $\beta$  treated, St infected macrophages and CXCL2 induction in the Ileal Epithelial MODE-K cell line.**

(A) WT C57BL6/J macrophages were pretreated for 60 minutes with media alone or 100 u/ml murine IFN- $\beta$  and infected with St strain SL1344 for 24 hours at an moi 4. Cell supernatants were harvested and chemokine and cytokine levels analyzed by ELISA. (B)  $4 \times 10^5$  MODEK murine epithelial cells were plated per well. Cells were pre-treated for 4 hours with media alone or media supplemented with 100 U/ml IFN $\beta$ . Cells were subsequently infected with SL1344 at an moi of 4 for 6 hours and mRNA levels of CXCL2 assayed by qRT-PCR.

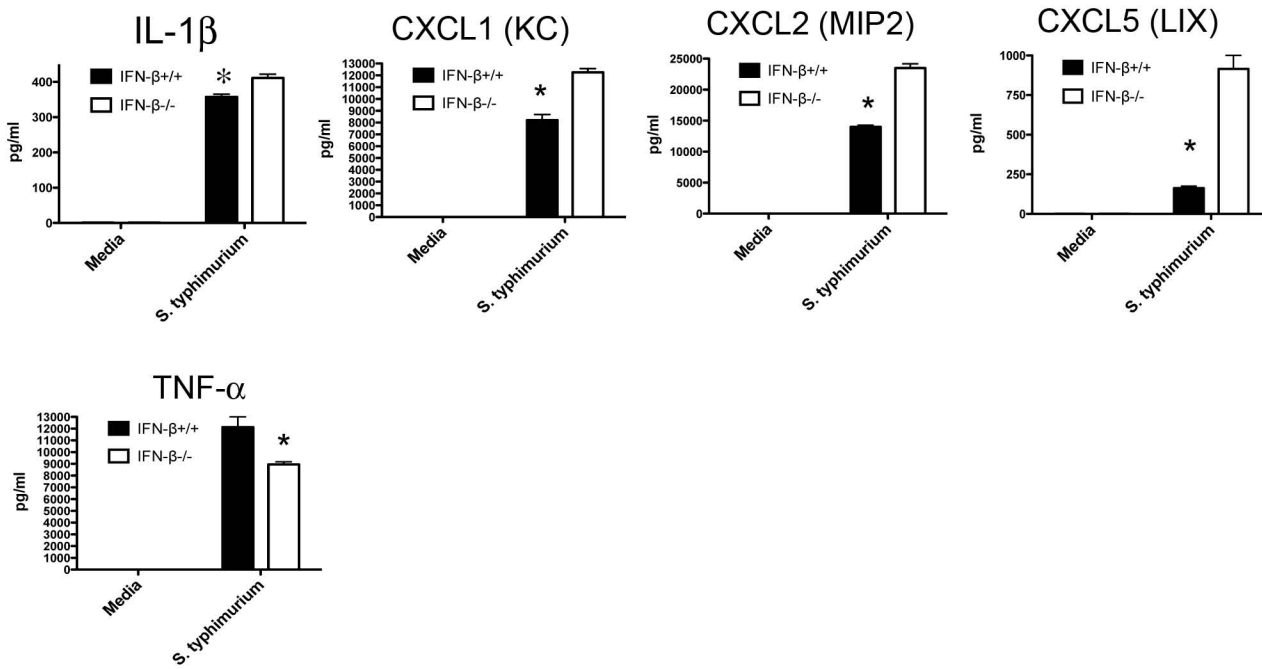

**Figure S2. Protein Secretion from IFN- $\beta$ <sup>+/+</sup> and IFN- $\beta$ <sup>-/-</sup> St infected macrophages.** WT or IFN- $\beta$ <sup>-/-</sup> macrophages were infected with St strain SL1344 for 24 hours at an moi 4. Cell supernatants were harvested and chemokine and cytokine levels analyzed by ELISA

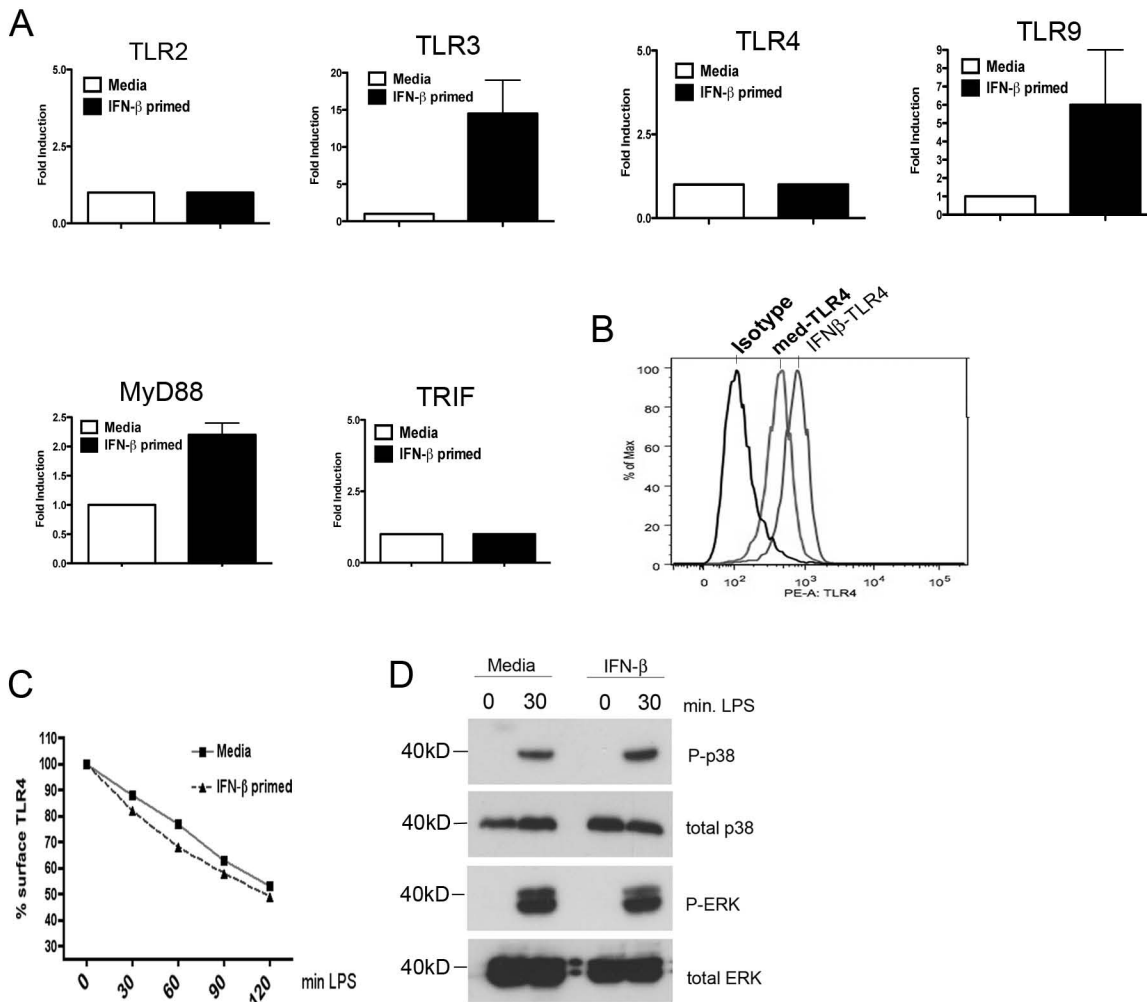

### Figure S3. IFN- $\beta$ does not suppress TLR4 expression, Intracellular Trafficking, or Signal Transduction

(A) WT C57BL6/J peritoneal macrophages were treated for 6 hours with IFN- $\beta$  and steady state expression levels of the indicated transcripts was determined by qRT PCR. (B) WT C57BL6/J peritoneal macrophages were treated as in (A) and steady state surface expression of TLR4 was quantified by Flow cytometry. (C) Media or IFN- $\beta$  pre-treated macrophages were stimulated with 100 ng/ml purified *E. coli* LPS. At the indicated times, surface TLR4 was assayed by flow cytometry. The remaining amount of surface TLR4 is expressed as a percent of MFI from non LPS treated cells. (D) Media or IFN- $\beta$  pre-treated macrophages were stimulated with 100 ng/ml *E. coli* LPS for 30 minutes and whole cell lysates were probed with antibodies against the indicated proteins by western blot. (E) WT C57BL6/J and TLR4<sup>-/-</sup> macrophages were treated for 4 hours with media alone or with 100 U/ml IFN- $\beta$  and subsequently infected for 2 hours with SL1344 at an moi of 4. Whole cell lysates were probed by western blot with the indicated antibodies
